# Supplementary material for: Routes to PSMA/GRPr Targeted Heterobivalent Conjugates: Synthetic Strategies and Their Evaluation
Source: Preprints.org preprint supplement (doi:10.20944/preprints202405.0810.v1), 2024-05-13
Supplement: Supplementary file 1 [file supplementary]

Compound **13**

*1H NMR* ***13*** *400 MHz, 273 K в DMSO-d6*

*ESI-MS* ***13****.*

*HRMS* ***13***

Compound **15**

*1H NMR* ***15****, 400 MHz, 293 K в DMSO-d6*

*HRMS* ***15****.*

Compound **18**

*1H NMR* ***18****, 400 MHz, 293 K в DMSO-d6*

*13С NMR* ***18****, 101 MHz, 293 K в DMSO-d6.*

*HRMS* ***18****.*

Compound **18x**

*1H NMR* ***18x****, 400 MHz, 293 K в DMSO-d6*

*13С NMR* ***18x****, 101 MHz, 293 K в DMSO-d6.*

Compound **20x**

*1H NMR* ***20x*****2TFA, 400 MHz, 293 K в DMSO-d6*

*1H NMR* ***20x****, 400 MHz, 293 K в DMSO-d6*

*13С NMR* ***20x*****2TFA, 101 MHz, 293 K в DMSO-d6.*

*15N NMR*  ***20x****, 41 MHz, 303 K в DMSO-d6.*

*ESI-MS* ***20x****.*

*HRMS* ***20x***

Compound **22x**

*1H NMR* ***22x*****3TFA, 400 MHz, 293 K в DMSO-d6*

Compound **12**

*1H NMR* ***12*** *400 MHz, 293 K в DMSO-d6*

Compound **24x**

*1H NMR* ***24x****, 400 MHz, 293 K в DMSO-d6*

*ESI-MS* ***24x****.*

Compound **26x**

*1H NMR* ***26x*** *400 MHz, 303 K в DMSO-d6*

*13С NMR* ***26x****, 101 MHz, 303 K в DMSO-d6.*

*15N NMR* ***26x****, 41 MHz, 303 K в DMSO-d6.*

*ESI-MS* ***26x****.*

*HRMS* ***26x***

Compound **27**

*1H NMR 1H NMR* ***27*** *400 MHz, 293 K в DMSO-d6*

*13С NMR* ***27****, 101 MHz, 293 K в DMSO-d6.*

*ESI-MS* ***27****.*

Compound **28**

*1H NMR* ***28*** *400 MHz, 293 K в DMSO-d6*

Compound **30**

*1H NMR* ***30*** *400 MHz, 293 K в DMSO-d6.*

Compound **31**

*1H NMR* ***31*** *400 MHz, 293 K в DMSO-d6*

Compound **32**

*1H NMR* ***32*** *400 MHz, 293 K в DMSO-d6*

Compound **33**

*1H NMR* ***33*** *400 MHz, 293 K в DMSO-d6*

Compound **34**

*1H NMR* ***34*1TFA*** *400 MHz, 293 K в DMSO-d6*

Compound **36**

*1H NMR* ***36*1TFA*** *400 MHz, 293 K в DMSO-d6*

*1H NMR* ***36*** *400 MHz, 293 K в DMSO-d6*

Compound **37**

*1H NMR* ***37*** *400 MHz, 293 K в DMSO-d6*

*13С NMR*  ***37****, 101 MHz, 293 K в DMSO-d6.*

*HRMS* ***37***

Compound **38**

*1H NMR* ***38*** *400 MHz, 273 K в DMSO-d6.*

Compound **39**

*ESI-MS* ***39***

Compound **40x**

*1H NMR* ***40x*** *400 MHz, 273 K в DMSO-d6.*

*ESI-MS* ***40x***
